# Supplementary material for: The site pair matching of a tandem Au/CuO–CuO nanocatalyst for promoting the selective electrolysis of CO2 to C2 products
Source: Royal Society of Chemistry journal article supplement (doi:10.1039/d1ra07507a), 2021-01-01
Supplement: d1ra07507a1.pdf [file d1ra07507a1.pdf]

## Supporting Information

### The site pair matching of a tandem Au/CuO–CuO nanocatalyst for promoting the selective electrolysis of CO<sub>2</sub> to C<sub>2</sub> products

Jun-Hao Zhou<sup>+</sup>, Chen-Yue Yuan<sup>+</sup>, Ya-Li Zheng, Hai-Jing Yin, Kun Yuan, Xiao-Chen Sun, and Ya-Wen Zhang\*

#### S1. Calculation of Faradaic Efficiency

##### S1.1 Gaseous Products

$$FE_{gas} = V_i \times \text{flow rate} \times \frac{nFp_0}{RT_0i}$$

$V_i$ : the volume concentration of certain product based on a calibration of the GC;

$n$ : number of transferred electrons for certain product;

$F$ : 96485 C mol<sup>-1</sup>;

$p_0$ : 1.013 bar;

$R$ : 8.314 J mol<sup>-1</sup> K<sup>-1</sup>;

$T_0$ : the temperature for testing;

$i$ : the steady-state current measured during a constant-potential electrolysis.

##### S1.2 Liquid Products

$$FE_{liquid} = V \times c \times \frac{nF}{Q}$$

$V$ : the volume of the electrolyte in the working cell;

$c$ : the concentration of liquid product after electrolysis, determined by <sup>1</sup>H NMR;

$n$ : number of transferred electrons for certain product;

$F$ : 96485 C mol<sup>-1</sup>

$Q$ : total charge consumed in the electrolysis.

## Supplementary Figures

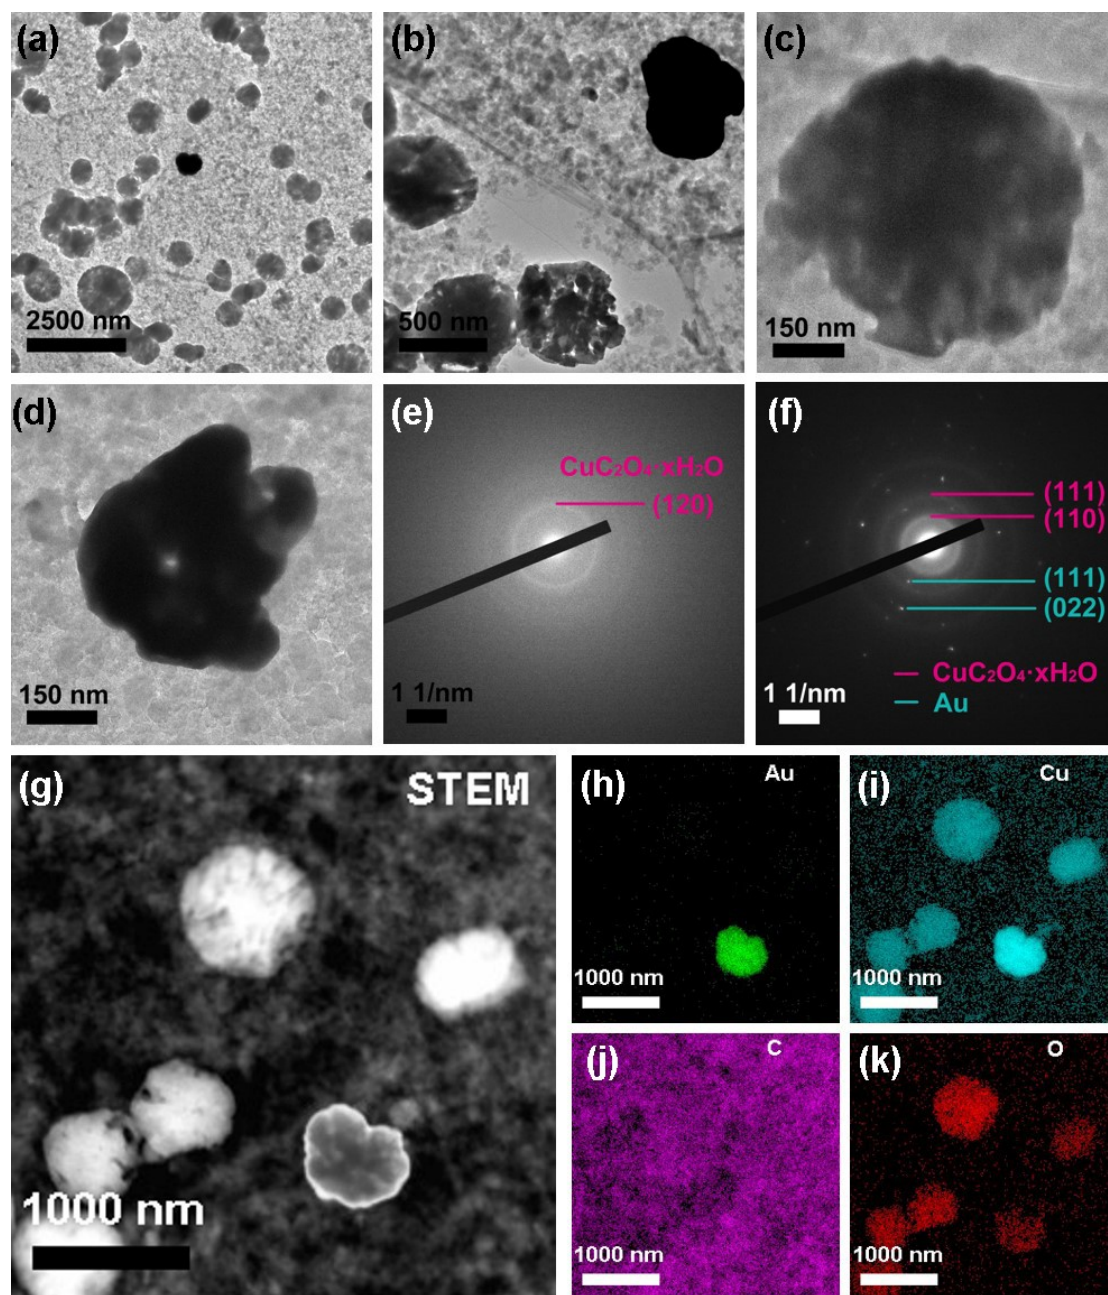

**Figure S1.** (a) to (d) TEM images of Au/Cu<sub>2</sub>O<sub>4</sub>/C; (e) and (f) SAED patterns of the particles in (c) and (d) respectively; (g) to (k) HAADF-STEM image and EDS elemental mappings of Au/Cu<sub>2</sub>O<sub>4</sub>/C.

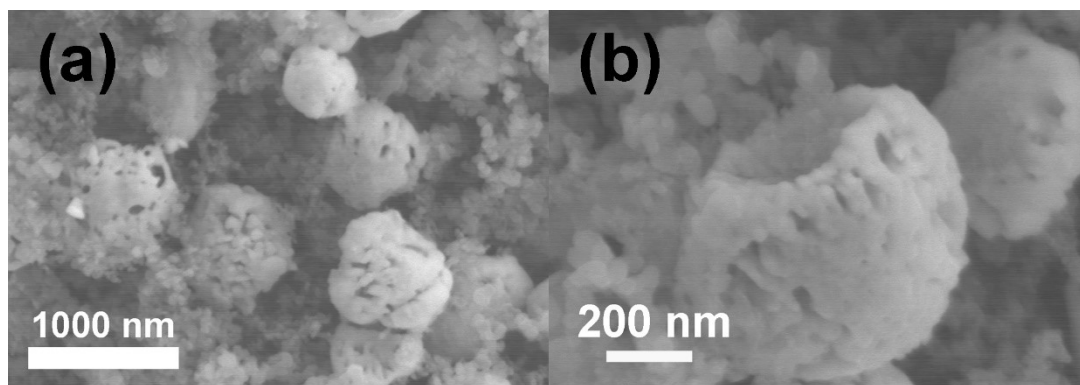

**Figure S2.** SEM image of Au/Cu<sub>2</sub>O<sub>4</sub>/C.

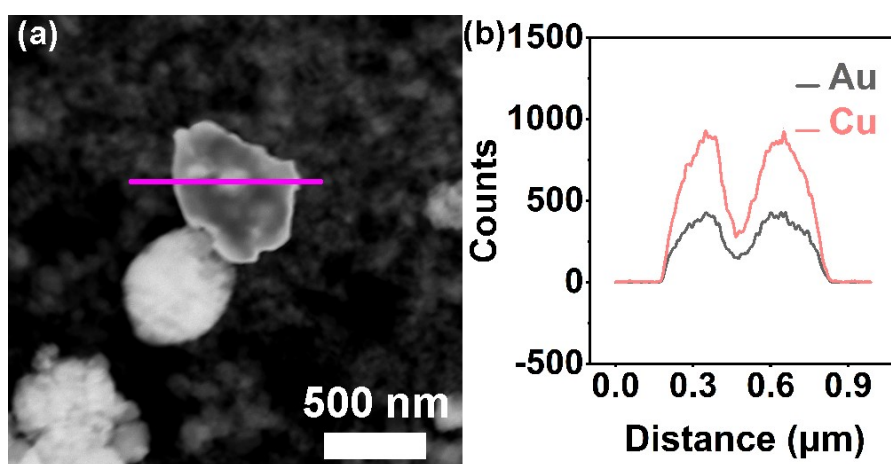

**Figure S3.** (b) EDS linear scanning result of Au/Cu<sub>2</sub>O<sub>4</sub>/C, and the scanning area is the violet line in (a).

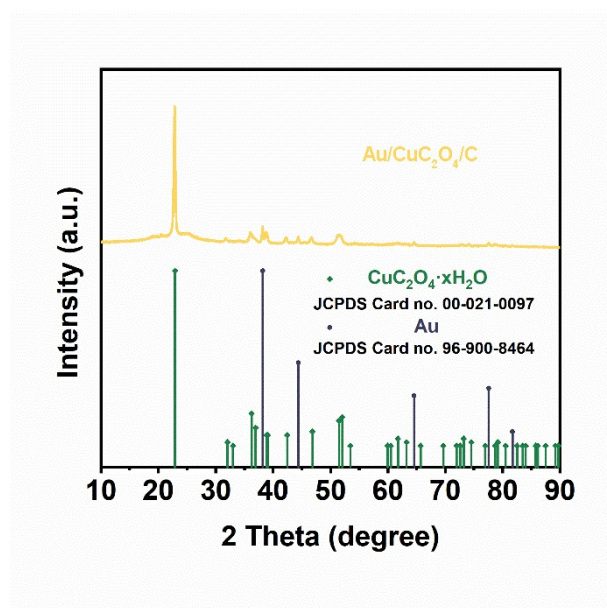

**Figure S4.** XRD pattern of Au/Cu<sub>2</sub>O<sub>4</sub>/C.

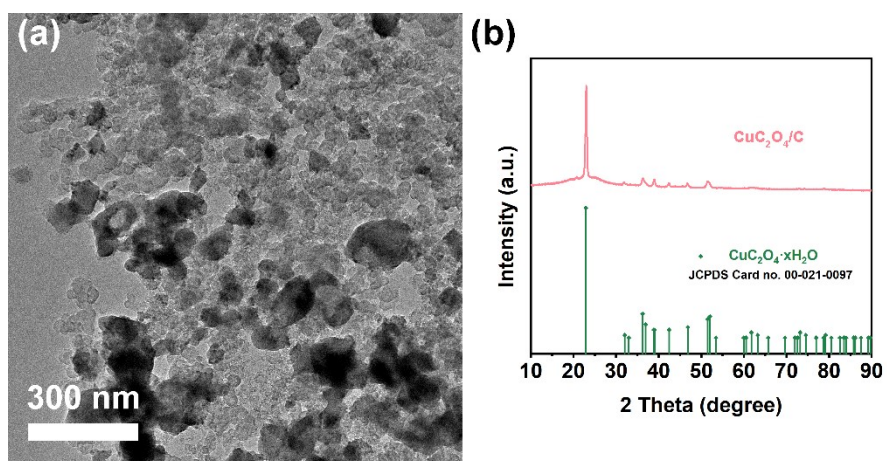

**Figure S5.** (a) TEM image and (b) XRD pattern of  $\text{CuC}_2\text{O}_4/\text{C}$ .

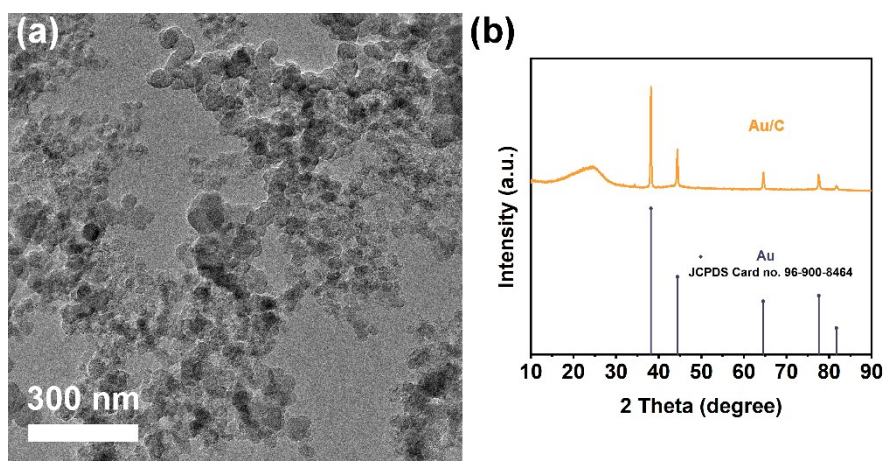

**Figure S6.** (a) TEM image and (b) XRD pattern of  $\text{Au}/\text{C}$ .

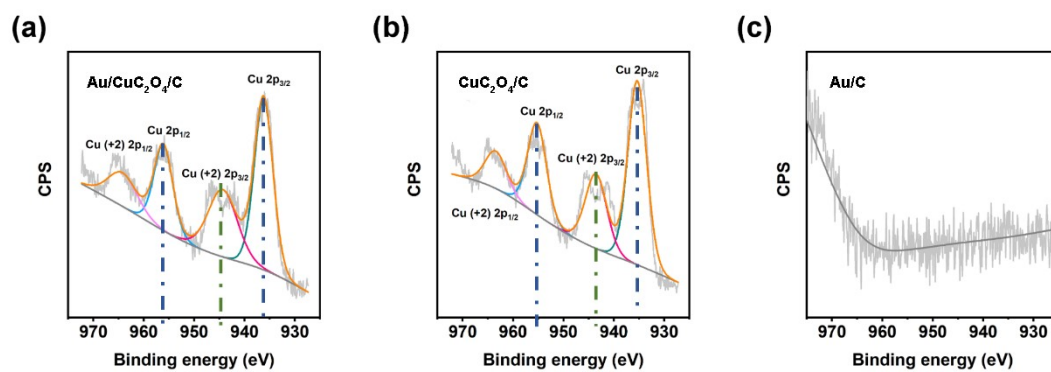

**Figure S7.** Cu 2p XPS spectra of (a)  $\text{Au}/\text{CuC}_2\text{O}_4/\text{C}$ , (b)  $\text{CuC}_2\text{O}_4/\text{C}$  and (c)  $\text{Au}/\text{C}$ .

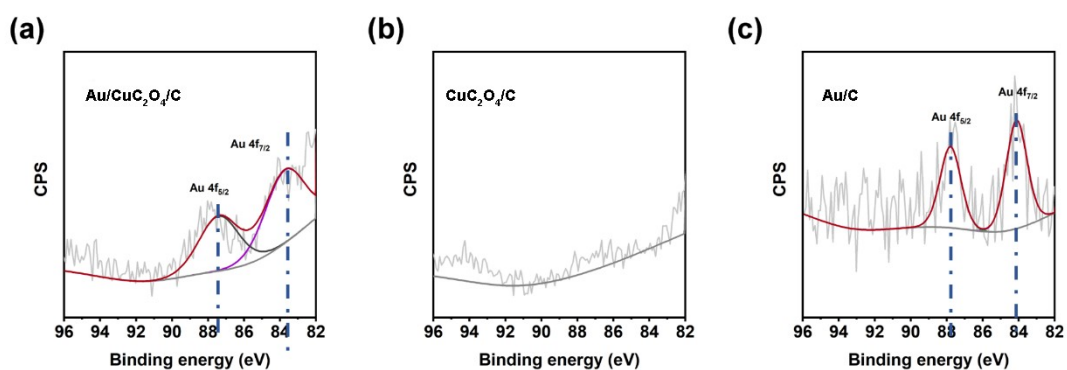

**Figure S8.** Au 4f XPS spectra of (a) Au/Cu<sub>2</sub>O<sub>4</sub>/C, (b) Cu<sub>2</sub>O<sub>4</sub>/C and (c) Au/C.

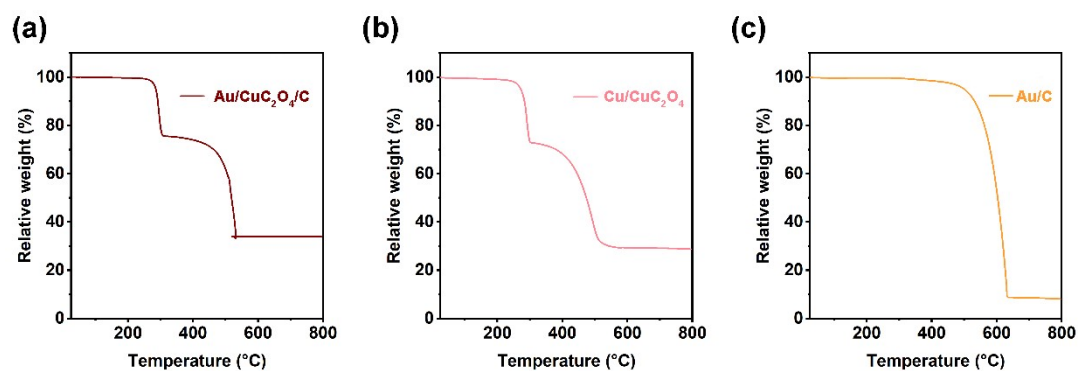

**Figure S9.** TGA curves of (a) Au/Cu<sub>2</sub>O<sub>4</sub>/C, (b) Cu<sub>2</sub>O<sub>4</sub>/C and (c) Au/C.

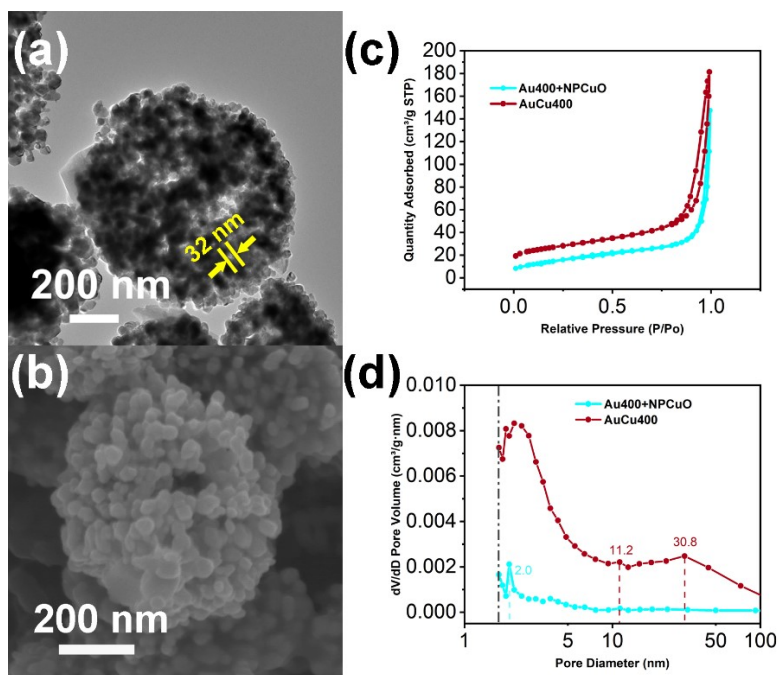

**Figure S10.** (a) TEM and (b) SEM image of AuCu400; (c) adsorption-desorption isotherms and (d) pore-size distribution curves of AuCu400 and Au400+NPCuO.

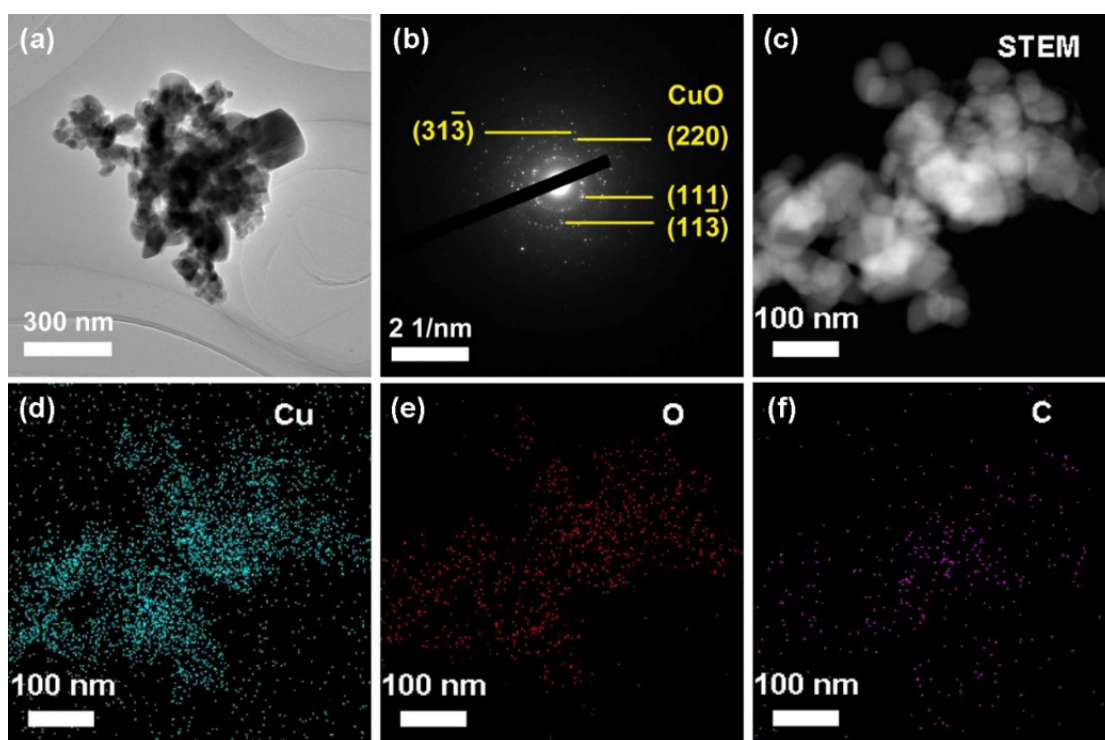

**Figure S11.** (a) TEM image of Cu400; (b) SAED pattern of Cu400; (c) to (f) HAADF-STEM image and EDS elemental mappings of Cu400.

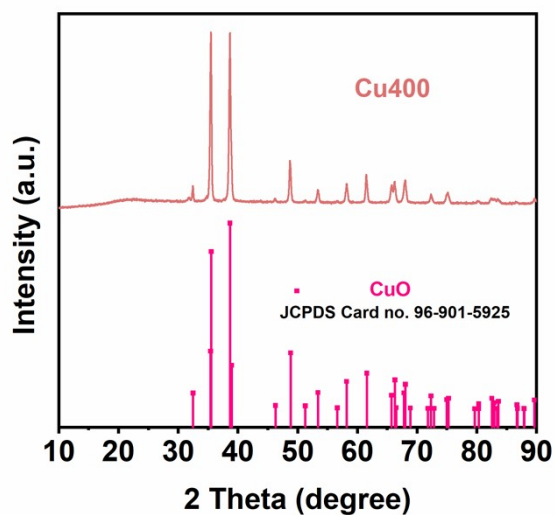

**Figure S12.** XRD pattern of Cu400.

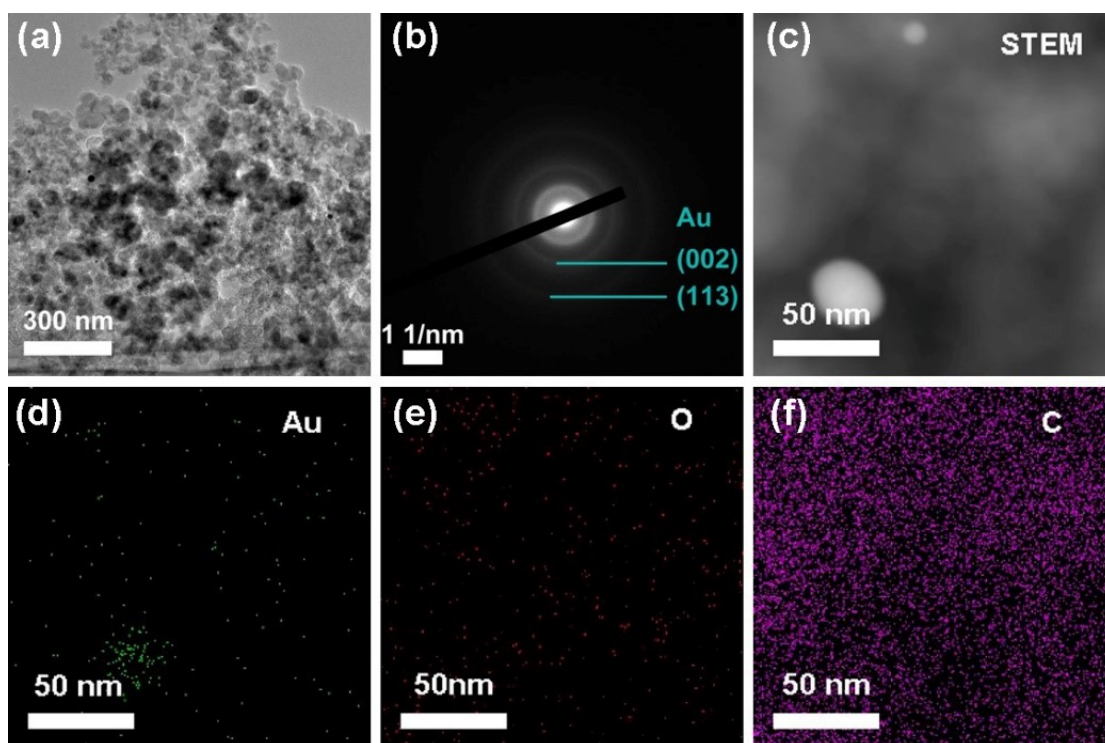

**Figure S13.** (a) TEM image of Au400; (b) SAED pattern of Au400; (c) to (f) HAADF-STEM image and EDS elemental mappings of Au400.

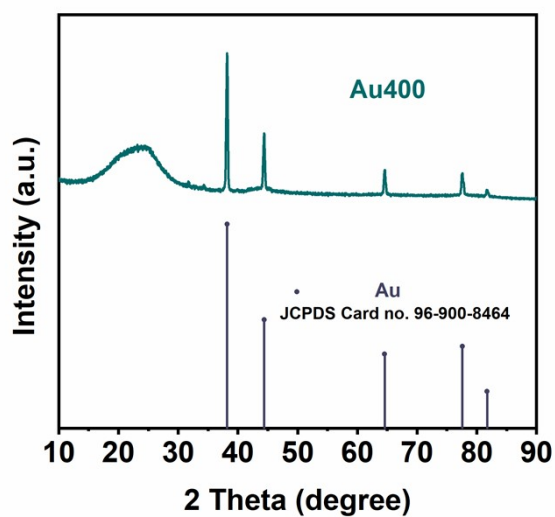

**Figure S14.** XRD pattern of Au400.

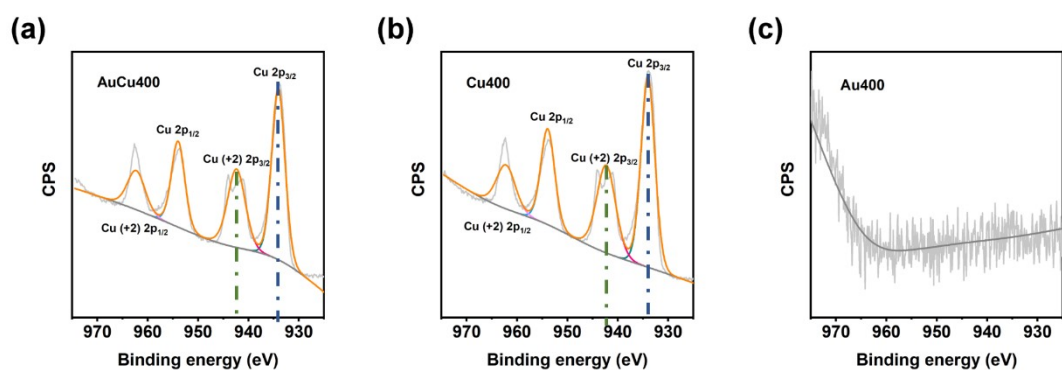

**Figure S15.** Cu 2p XPS spectra of (a) AuCu400, (b) Cu400 and (c) Au400.

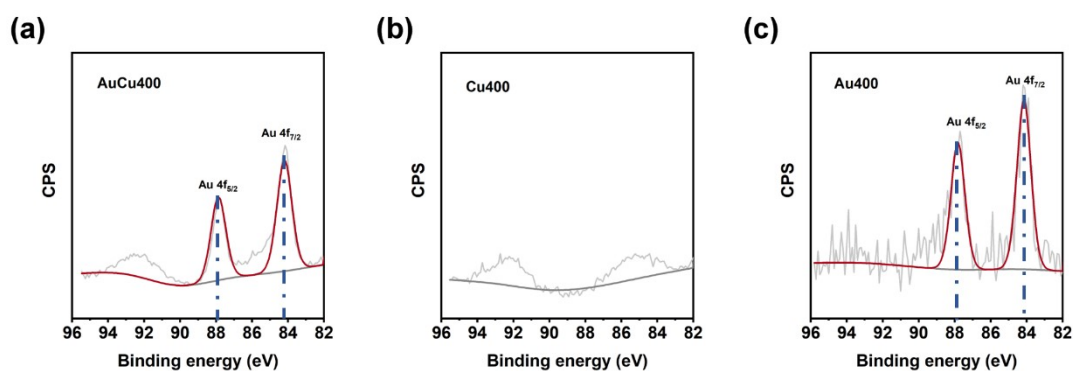

**Figure S16.** Au 4f XPS spectra of (a) AuCu400, (b) Cu400 and (c) Au400.

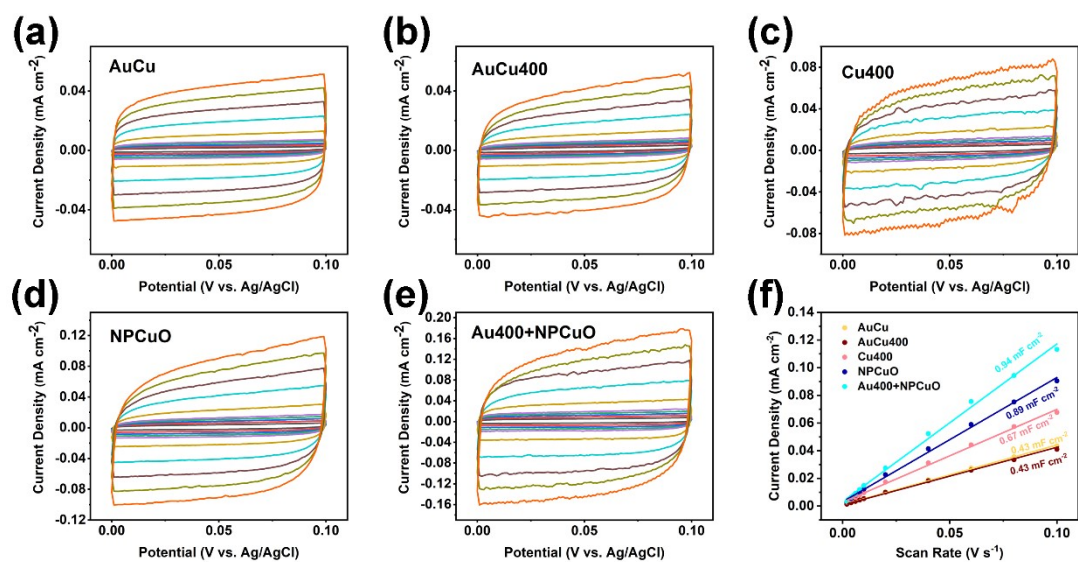

**Figure S17.** CV curves of (a) AuCu, (b) AuCu400, (c) Cu400, (d) NPCuO and (e) Au400+NPCuO, and (f) plots of current density versus scan rate of them.



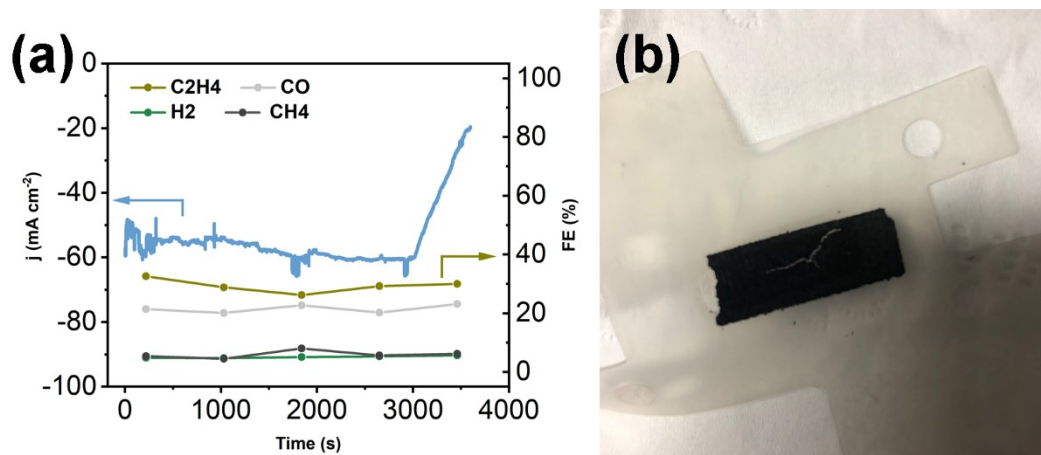

**Figure S18.** (a) Time-dependent current density curve and  $FE_{C_2H_4}$ ,  $FE_{CO}$ ,  $FE_{H_2}$  and  $FE_{CH_4}$  of AuCu400 in 1 M KOH solution at -1.0V; (b) photos of the broken carbon paper-based gas diffusion electrodes after the test.

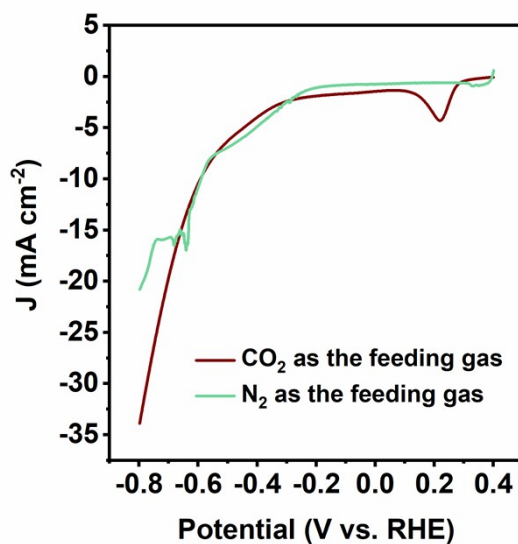

**Figure S19.** LSV curves of AuCu400 using CO<sub>2</sub> or N<sub>2</sub> as the feeding gas and 1 M KOH aqueous solution as the electrolyte.

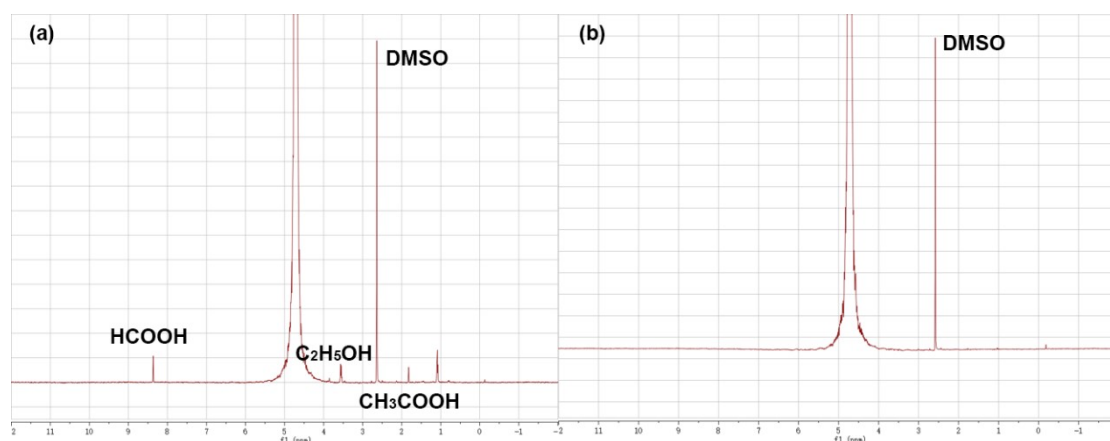

**Figure S20.**  $^1\text{H}$  NMR spectra of the electrolyte after electrolysis at  $-1.0$  V vs. RHE for AuCu400 using (a)  $\text{CO}_2$  or (b)  $\text{N}_2$  as the feeding gas and 1 M KOH aqueous solution as the electrolyte.

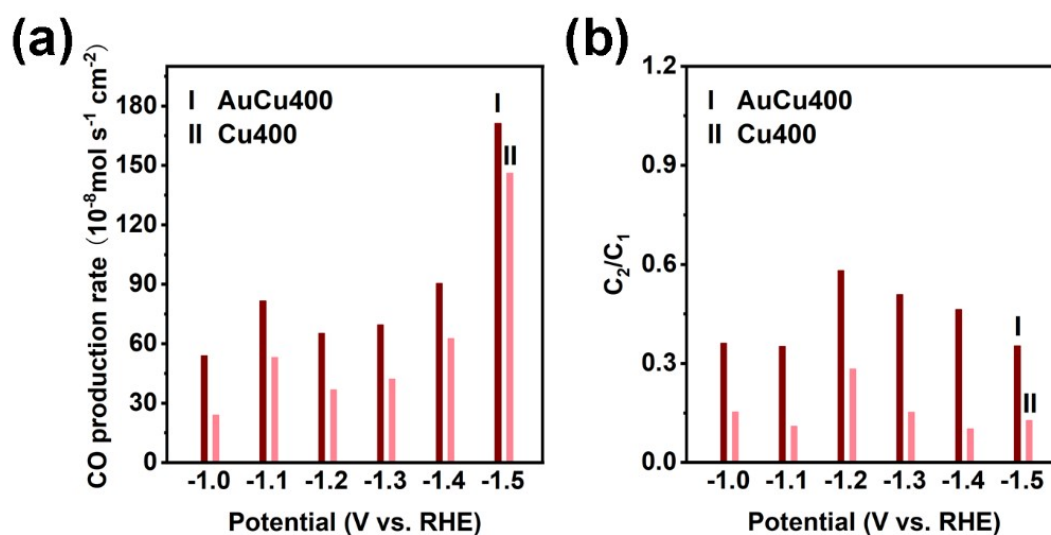

**Figure S21.** (a) The CO production rates and (b) the ratios of  $\text{C}_{2+}$  to  $\text{C}_1$  products of AuCu400 and Cu400.

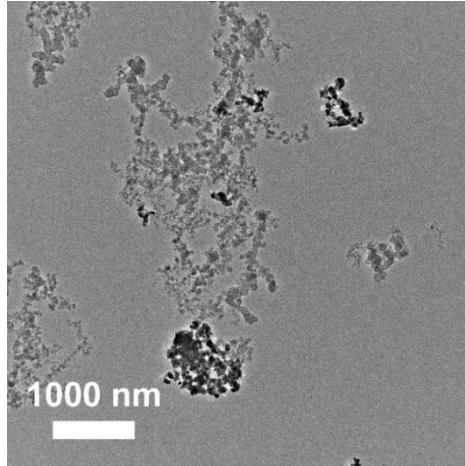

**Figure S22.** TEM image of Au400+Cu400.

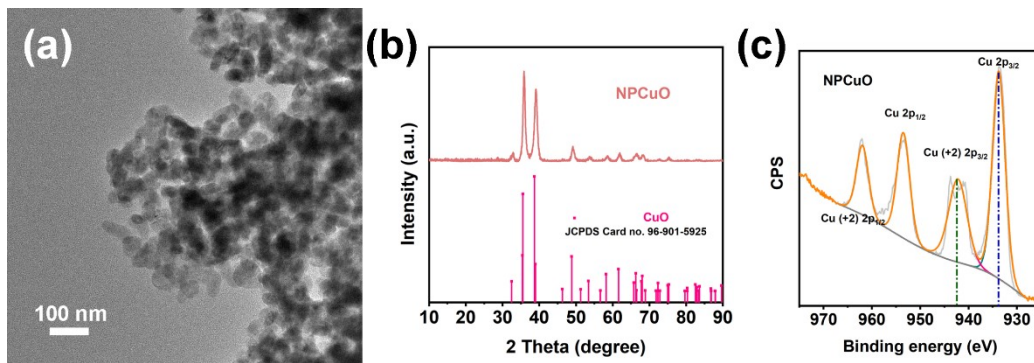

**Figure S23.** (a) TEM image, (b) XRD pattern and (c) Cu 2p XPS spectra of NPCuO.

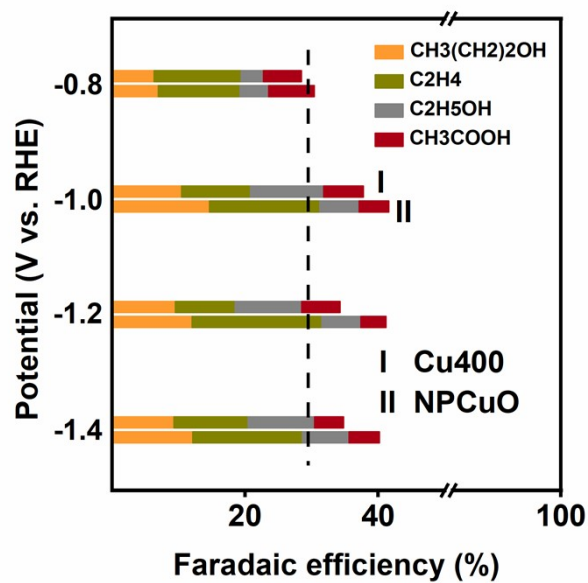

**Figure S24.** C<sub>2+</sub> products FEs of Cu400 and NPCuO using CO as the feeding gas.

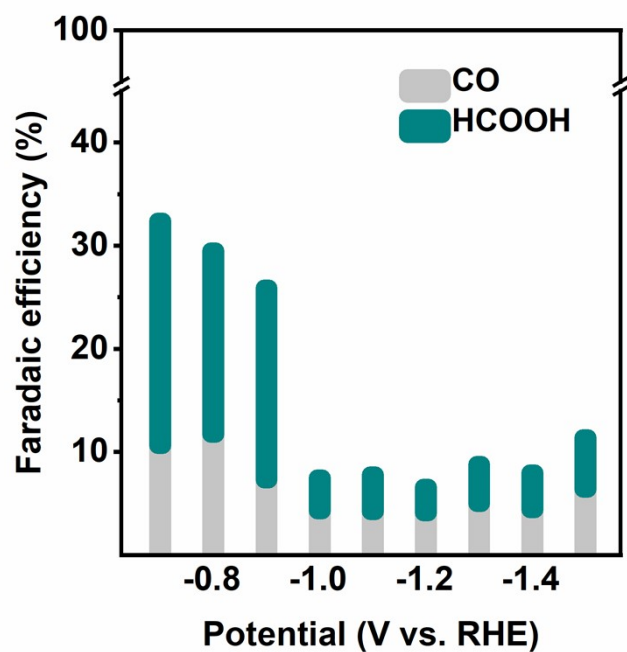

Figure S25. CO<sub>2</sub> reduction products FE of Au400 using CO<sub>2</sub> as the feeding gas.

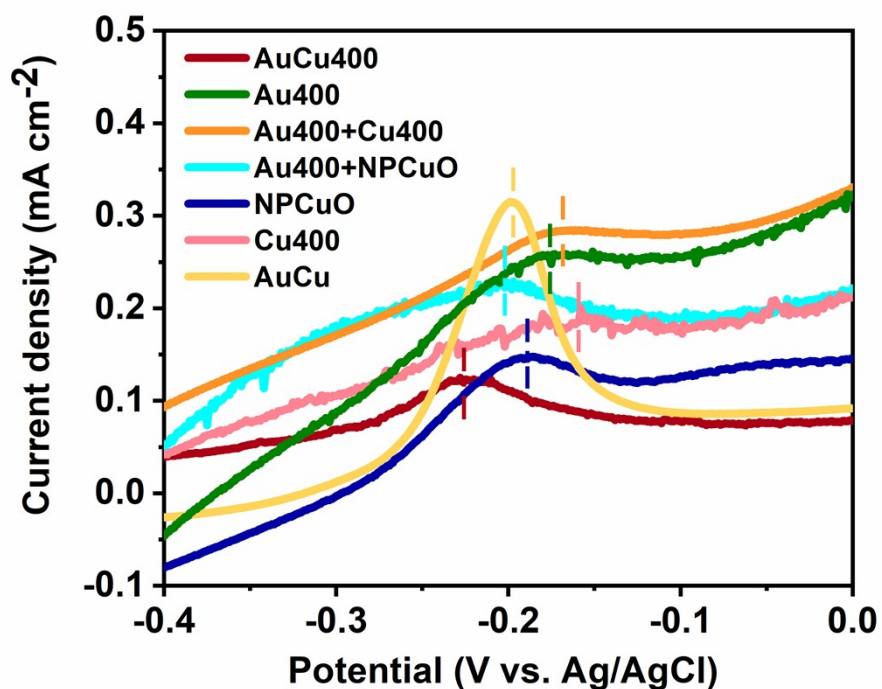

Figure S26. Oxidative LSV scans in N<sub>2</sub>-saturated aqueous 1 M KOH solution of AuCu400, Au400, Cu400, AuCu, NPCuO, Au400+Cu400 and Au400+NPCuO.

## Supplementary Tables

**Table S1.** H<sub>2</sub> FE of samples in the articles at applied potentials (V vs. RHE).

|                | -1.0        | -1.1         | -1.2         | -1.3         | -1.4         | -1.5         |
|----------------|-------------|--------------|--------------|--------------|--------------|--------------|
| <b>AuCu400</b> | <b>4.8%</b> | <b>12.9%</b> | <b>12.0%</b> | <b>12.9%</b> | <b>16.3%</b> | <b>13.1%</b> |
| Cu400          | 21.0%       | 21.2%        | 19.6%        | 27.3%        | 23.8%        | 43.1%        |
| Au400          | 59.8%       | 58.7%        | 56.0%        | 58.6%        | 59.4%        | 58.1%        |
| AuCu           | 19.5%       | 32.5%        | 31.9%        | 24.5%        | 33.7%        | 21.5%        |
| Au400+NPCuO    | 31.4%       | 21.7%        | 23.1%        | 18.8%        | 24.7%        | 30.5%        |
| Au400+Cu400    | 35.7%       | 48.9%        | 38.1%        | 32.1%        | 41.4%        | 40.5%        |
| NPCuO          | 24.1%       | 25.2%        | 31.0%        | 31.1%        | 34.5%        | 34.8%        |

**Table S2.** C<sub>2+</sub> Products Faradaic efficiency of Au-Cu-based eCO<sub>2</sub>RR electrocatalysts reported in the literatures.

|                                                                                         | FE                                                                      | Potential (V vs. RHE)                       | Ref              |
|-----------------------------------------------------------------------------------------|-------------------------------------------------------------------------|---------------------------------------------|------------------|
| S2-1 Au-Cu tandem                                                                       |                                                                         |                                             |                  |
| Au NPs on Cu foil                                                                       | C <sub>2</sub> H <sub>5</sub> OH 25.18%                                 | -0.97                                       | 29               |
| Au NBP-Cu JNCs                                                                          | C <sub>2</sub> H <sub>4</sub> & C <sub>2</sub> H <sub>6</sub> 46.4%     | -0.98                                       | 30               |
| AuCu                                                                                    | C <sub>2+</sub> 70.1%                                                   | -1.05                                       | 31               |
| Au@Cu <sub>2</sub> O                                                                    | C <sub>2</sub> H <sub>5</sub> OH 52.3%                                  | -0.3                                        | S1               |
| Au and Cu lines device                                                                  | C <sub>2+</sub> ~56%                                                    | -1.0                                        | S2               |
| Au <sub>0.02</sub> Cu <sub>2</sub> O                                                    | C <sub>2</sub> H <sub>4</sub> 24.4%                                     | -1.3                                        | S3               |
| <b>Au/CuO-CuO</b>                                                                       | <b>C<sub>2</sub> 52.8%</b>                                              | <b>-1.0</b>                                 | <b>This work</b> |
| S2-2 Au-Cu for C <sub>1</sub>                                                           |                                                                         |                                             |                  |
| AuCu NPs                                                                                | CO 80%                                                                  | -0.77                                       | 32               |
| Au <sub>3</sub> Cu Cu <sub>3</sub> Au                                                   | CO ~60%                                                                 | -0.7 ~ -1.1                                 | 34               |
| hollow Au-Cu NPs                                                                        | CO 53.3%                                                                | -0.7                                        | 35               |
| Au-Cu nanowire                                                                          | CO & HCOOH ~40%                                                         | -1.0 vs. SHE<br>(0.1 M NaHCO <sub>3</sub> ) | S4               |
| Au <sub>3</sub> Cu                                                                      | CO 98.12%                                                               | -0.7                                        | S5               |
| Cu/Au                                                                                   | HCOOH 81%                                                               | -0.6                                        | S6               |
| S2-3 Au-Cu for C <sub>2</sub> (alloying effect, electronic effect and geometric effect) |                                                                         |                                             |                  |
| 4H/ <i>fcc</i> Au@Cu                                                                    | C <sub>2</sub> H <sub>4</sub> 46.7%                                     | -1.17                                       | S7               |
| AuCu alloy NPs                                                                          | C <sub>2</sub> H <sub>4</sub> & C <sub>2</sub> H <sub>5</sub> OH<br>44% | -1.0                                        | S8               |
| Cu <sub>63.9</sub> Au <sub>36.1</sub> /NCF                                              | C <sub>2</sub> H <sub>5</sub> OH 12%                                    | /                                           | S9               |

## Supplementary References

- S1 B. Zhang, Y. Wang, S. Xu, K. Chen, Y. Yang, Q. Kong, Tuning nanocavities of Au@Cu<sub>2</sub>O yolk-shell nanoparticles for highly selective electroreduction of CO<sub>2</sub> to ethanol at low potential, *RSC Advances*, 2020, **10**, 19192-19198.
- S2 Y. Lum, J. W. Ager, Sequential catalysis controls selectivity in electrochemical CO<sub>2</sub> reduction on Cu, *Energy & Environmental Science*, 2018, **11**, 2935-2944.
- S3 X. Cao, G. Cao, M. Li, X. Zhu, J. Han, Q. Ge, H. Wang, Enhanced ethylene formation from carbon dioxide reduction through sequential catalysis on Au decorated cubic Cu<sub>2</sub>O electrocatalyst, *European Journal of Inorganic Chemistry*, 2021, **2021**, 2353-2364.
- S4 B. A. Zhang, D. G. Nocera, Cascade electrochemical reduction of carbon dioxide with bimetallic nanowire and foam electrodes, *ChemElectroChem*, 2021, **8**, 1918-1924.
- S5 X. Ma, Y. Shen, S. Yao, M. Shu, R. Si, C. An, Self-supported nanoporous Au<sub>3</sub>Cu electrode with enriched gold on surface for efficient electrochemical reduction of CO<sub>2</sub>, *Chemistry-A European Journal*, 2020, **26**, 4143-4149.
- S6 Z. Tao, Z. Wu, X. Yuan, Y. Wu, H. Wang, Copper-gold interactions enhancing formate production from electrochemical CO<sub>2</sub> reduction, *ACS Catalysis*, 2019, **9**, 10894-10898.
- S7 Y. Chen, Z. Fan, J. Wang, C. Ling, W. Niu, Z. Huang, G. Liu, B. Chen, Z. Lai, X. Liu, B. Li, Y. Zong, L. Gu, J. Wang, X. Wang, H. Zhang, Ethylene selectivity in electrocatalytic CO<sub>2</sub> reduction on Cu nanomaterials: A crystal phase-dependent study, *J Am Chem Soc*, 2020, **142**, 12760-12766.
- S8 S. Shen, X. Peng, L. Song, Y. Qiu, C. Li, L. Zhuo, J. He, J. Ren, X. Liu, J. Luo, AuCu alloy nanoparticle embedded Cu submicrocone arrays for selective conversion of CO<sub>2</sub> to ethanol, *Small*, 2019, **15**, e1902229.
- S9 F. Jia, X. Yu, L. Zhang, Enhanced selectivity for the electrochemical reduction of CO<sub>2</sub> to alcohols in aqueous solution with nanostructured Cu-Au alloy as catalyst, *Journal of Power Sources*, 2014, **252**, 85-89.
